# Supplementary material for: An eco-friendly water-assisted polyol method to enhance the aspect ratio of silver nanowires
Source: Royal Society of Chemistry journal article supplement (doi:10.1039/c8ra08810a), 2019-01-01
Supplement: c8ra08810a1.pdf [file c8ra08810a1.pdf]

## Supplementary Information

### An eco-friendly water-assisted polyol method to enhance aspect ratio of silver nanowires

Wei Zhao,<sup>a,b†</sup> Sha-Sha Wang,<sup>a†\*</sup> Hong-Tao Cao,<sup>a</sup> Ling-Hai, Xie,<sup>a\*</sup> Chao-Shen Hong,<sup>a</sup> Ling-Zhi Jin,<sup>a</sup> Meng-Na Yu,<sup>a</sup> He Zhang,<sup>a</sup> Zhi-Yun Zhang<sup>b</sup>, Li-Hua Huang<sup>c</sup> and Wei Huang<sup>a,d</sup>

a Key Laboratory for Organic Electronics and Information Displays (KLOEID) Institute of Advanced Materials (IAM)

Jiangsu National Synergetic Innovation Center for Advanced Materials (SICAM). Nanjing University of Posts & Telecommunications (NUPT)

9 Wenyuan Road, Nanjing 210023, China

E-mail: iamsswang@njupt.edu.cn; iamlhxie@njupt.edu.cn

ORCID: Dr. SS,Wang 0000-0002-8724-4627; Dr. HT,Cao 0000-0002-2167-310; Prof. LH,Xie 0000-0001-6294-5833; Prof. W,Huang ORCID: 0000-0001-7004-6408

b. Nanjing College of Information Technology(NCIT). 99 Wenlan Road, Nanjing 210023, China

c. Shenzhen Institute of Technology, Shen Zhen, Guangdong, 518000, China

d. Shaanxi Institute of Flexible Electronics (SIFE), Northwestern Polytechnical University (NPU), 127 West Youyi Road, Xi'an 710072, Shaanxi, China

† These authors contributed equally to this work.

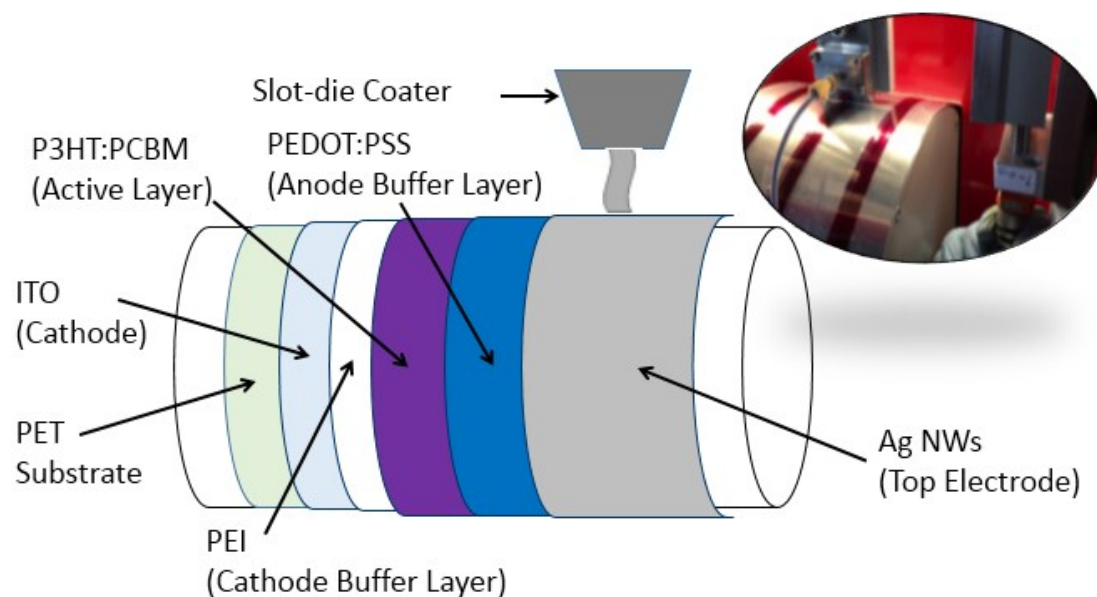

**Fig.S1** The slot-die coating of inverted semi-transparent OSCs with printed Ag NWs top electrodes. The photo inset upper right showed the slot-die coating operation.

The coating parameters changed were the injection speed ( $I$ ), coating speed ( $v$ ) and temperature of the roll ( $T$ ). PEI ( $M_w = 10000$ ) dispersed in isopropyl alcohol (0.1 wt %) is coated on flexible substrates ( $I = 0.1 \mu\text{m}/\text{min}$ ,  $v = 1 \text{ m}/\text{min}$ ,  $T = 40 \text{ }^\circ\text{C}$ ) and the layer was dried at  $40 \text{ }^\circ\text{C}$  for 10 min. P3HT ( $M_w = 30,000$ ) purchased from J&K and PCBM (technical grade 99 %) from Sigma, were both dissolved at a concentration of 20 mg/ml in a volume ratio 1:1 in *o*-xylene and stirred for 15 min at  $80 \text{ }^\circ\text{C}$  before coating. The photoactive layer (PAL) was then coated on flexible substrates ( $I = 0.2 \mu\text{m}/\text{min}$ ,  $v = 1 \text{ m}/\text{min}$ ,  $T = 40 \text{ }^\circ\text{C}$ ). 25 mL PEDOT:PSS (Sigma, 1 % in  $\text{H}_2\text{O}$ ) was mixed with 1.5 mL diethylene glycol (DEG, 99 %, sigma) and 125  $\mu\text{L}$  fluorinated surfactant (Capstone<sup>®</sup>FS-31, Dupont), then coated ( $I = 0.3 \mu\text{m}/\text{min}$ ,  $v = 1 \text{ mL}/\text{min}$ ,  $T = 40 \text{ }^\circ\text{C}$ ) and dry at  $100 \text{ }^\circ\text{C}$  for 5 min. The devices were completed by slot-die coating ( $I = 0.3 \mu\text{m}/\text{min}$ ,  $v = 0.6 \text{ m}/\text{min}$ ,  $T = 60 \text{ }^\circ\text{C}$ ) the as prepared Ag NWs from ethanol solution (0.5 mg/ml). Finally, the devices were annealed at  $120 \text{ }^\circ\text{C}$  for 5 min.

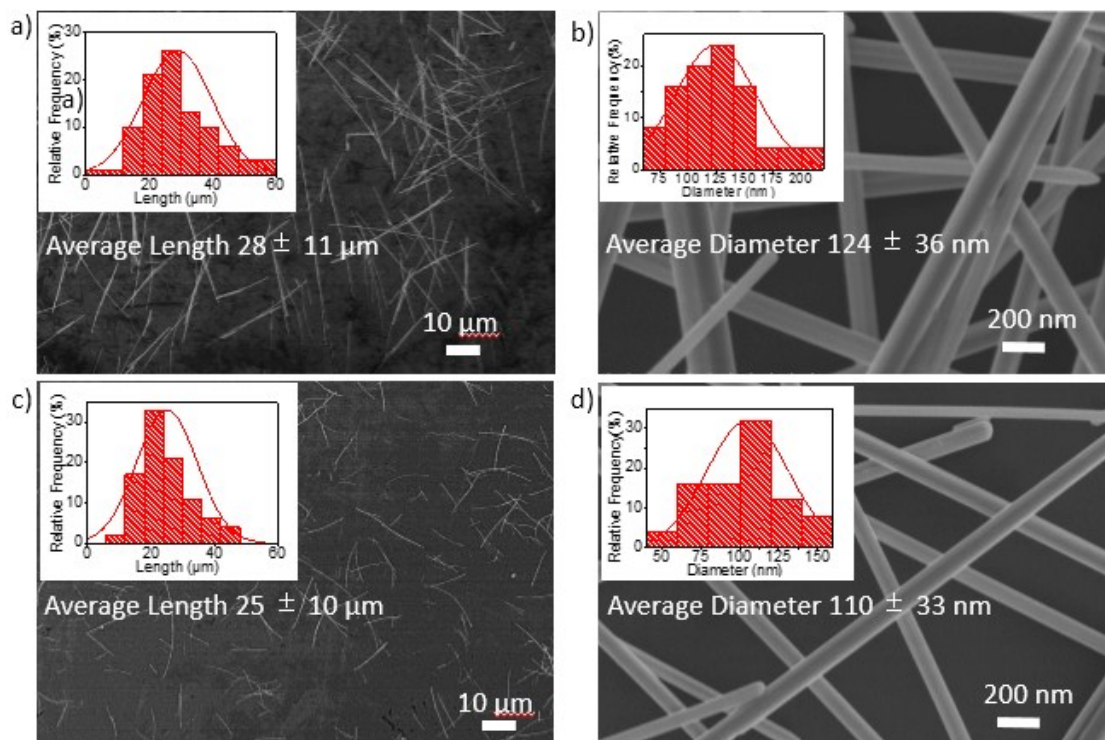

**Fig S2.** The SEM of Ag NWs synthesized with PVP of molecular weight 58000 by (a,b) water-assisted and (c,d) waterless polyol method

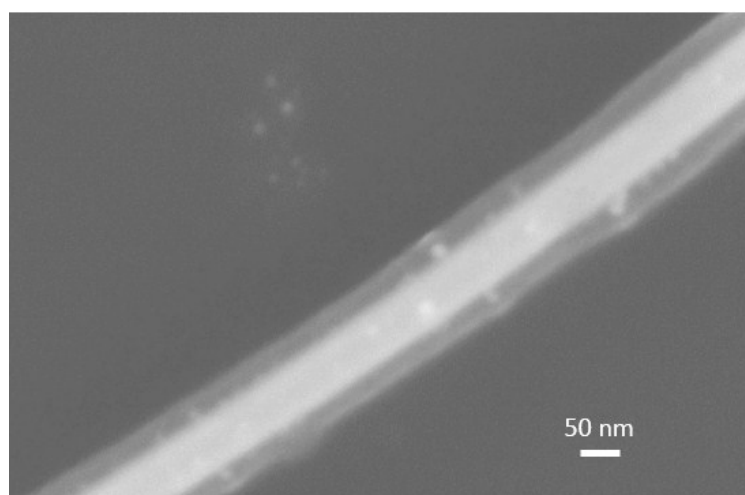

**Fig S3.** The core-shell structure of Ag NWs made by PVP of molecular weight 1300000 without water

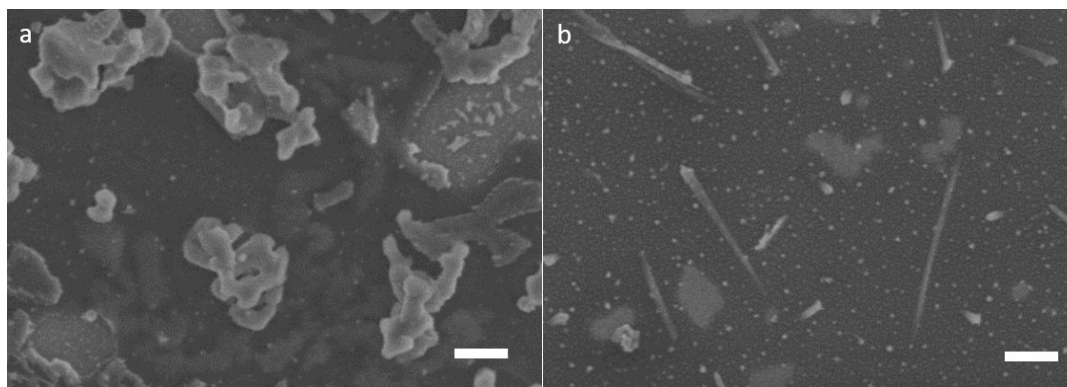

**Fig S4.** The SEM of Ag NWs reacted for 5 minutes: a) without water and b) with water. The scale bar is 1  $\mu\text{m}$ .

**Table. S1** The performance of TCF made from different type AgNWs and solvents

| Polyol Progress | solvent  | $R_{\square}/\Omega$ | transmittance | Haze  | Figure of Merits (F.O.M) |
|-----------------|----------|----------------------|---------------|-------|--------------------------|
| Waterless       | Methanol | 21.2                 | 75.1%         | 8.65% | 58                       |
| Waterless       | Ethanol  | 19.3                 | 80.9%         | 8.50% | 87                       |
| Water-assisted  | Methanol | 9.3                  | 76.8%         | 5.08% | 143                      |
| Water-assisted  | Ethanol  | 8.1                  | 81.9%         | 4.68% | 222                      |

Generally, the transmittance and sheet resistance for thin conduct films are related by the equation followed:<sup>1,2</sup>

$$T = \left( 1 + \frac{1}{2 R_s} \sqrt{\frac{\mu_0}{\epsilon_0}} \frac{\sigma_{op}}{\sigma_{dc}} \right)^{-2} = \left( 1 + \frac{188.5}{R_s} \frac{\sigma_{op}}{\sigma_{dc}} \right)^{-2}$$

$\sigma_{dc}$ : direct current conductivity;  $\sigma_{op}$ : Optical rate;  $\mu_0$ : permeability of vacuum;  $\epsilon_0$ : permittivity of vacuum ;  $R_s$ : sheet resistance ; T: light transmittance

The ratio of the DC conductivity to the optical conductivity,  $\sigma_{dc}/\sigma_{op}$ , was often used to evaluate the performance of transparent conductors, so F.O.M equals  $\sigma_{dc}/\sigma_{op}$

Haze is another important parameter for TCE in addition to transparency and sheet resistance. It's calculated by the ratio of diffuse transmission and total transmission while diffuse transmission is strongly related to light scattering of surface.

**Table. S2** The aspect ratio of Ag NWs made by different polyol progresses

| FACTOR<br>EXPNO | H <sub>2</sub> O addition time | H <sub>2</sub> O/EG (vol%) | Mw(PVP)   | Aspect ratio (L/D)                 |
|-----------------|--------------------------------|----------------------------|-----------|------------------------------------|
| 1               | NA                             | NA                         | 58,000    | ~227                               |
| 2               | NA                             | NA                         | 1,300,000 | ~280                               |
| 3               | With AgNO <sub>3</sub>         | 2%                         | 1,300,000 | ~180                               |
| 4               | With AgCl                      | 2%                         | 58,000    | ~225                               |
| 5               | With AgCl                      | 1%                         | 1,300,000 | ~500, lots of nanoparticles        |
| 6               | With AgCl                      | 2%                         | 1,300,000 | ~1600, the best                    |
| 7               | With AgCl                      | 4%                         | 1,300,000 | ~240, lots of particles & nanorods |

Typical polyol progress:

EG + PVP (heat 30 min) → adding of AgCl (stir 5 min) → slow injection of AgNO<sub>3</sub> (10 min) → react 30 min

1. D. S. Hecht, L. Hu and G. Irvin, *Advanced materials*, 2011, **23**, 1482-1513.
2. Y. Liu, Y. Chen, R. Shi, L. Cao, Z. Wang, T. Sun, J. Lin, J. Liu and W. Huang, *RSC Adv.*, 2017, **7**, 4891-4895.
